# Supplementary material for: Comprehensive Genomic Analysis of BAHD Gene Family: Expression Patterns During Development and Stress Responses in Pecan (Carya illinoinensis)
Source: Research Square preprint supplement (doi:10.21203/rs.3.rs-7300832/v1), 2025-10-01
Supplement: Supplementary file 1 [file 5a2b565ab0cdcb2cac62575d.xlsx]

## Sheet: Sheet1
Table 3 The member of AtBAHD , CiBAHD, and HvBAHD in each group
Group name	AtBAHD members	CiBAHD members	HvBAHD members	Total number
Clade Ⅰa	AT1G03495	CiBHAD14	HvBAHD24	30
	AT5G23940	CiBHAD23	HvBAHD114
	AT3G29680	CiBHAD24	HvBAHD106
	AT5G61160	CiBHAD21	HvBAHD38
	AT3G29635		HvBAHD96
	AT3G29670		HvBAHD98
	AT5G39050		HvBAHD88
	AT5G39080		HvBAHD1
	AT5G39090		HvBAHD60
	AT3G29590		HvBAHD58
			HvBAHD33
			HvBAHD61
			HvBAHD56
			HvBAHD94
			HvBAHD68
			HvBAHD103
Clade Ⅰb	AT5G23940	CiBHAD35	HvBAHD15	41
	AT5G42830	CiBHAD88	HvBAHD12
	AT5G07850	CiBHAD84	HvBAHD21
	AT5G07870	CiBHAD83	HvBAHD23
	AT5G07860	CiBHAD13	HvBAHD22
	AT5G67150	CiBHAD12	HvBAHD108
	AT3G50270	CiBHAD11	HvBAHD25
	AT5G38130	CiBHAD2	HvBAHD28
	AT3G50300	CiBHAD1	HvBAHD27
	AT3G50280	CiBHAD70	HvBAHD85
	AT5G01210	CiBHAD61	HvBAHD95
	AT2G39980	CiBHAD9	HvBAHD47
		CiBHAD17	HvBAHD13
			HvBAHD52
			HvBAHD59
			HvBAHD6
Clade Ⅱ	AT4G29250	CiBHAD76	HvBAHD83	12
	AT4G24510	CiBHAD45	HvBAHD31
	AT3G23840	CiBHAD54
		CiBHAD56
		CiBHAD51
		CiBHAD3
		CiBHAD15
Clade Ⅲa	AT1G24430	CiBHAD52		36
	AT3G26040	CiBHAD25
	AT5G23970	CiBHAD85
	AT5G47980	CiBHAD87
	AT4G15400	CiBHAD86
	AT1G24420	CiBHAD44
	AT5G47950	CiBHAD33
	AT4G15390	CiBHAD32
	AT3G30280	CiBHAD31
		CiBHAD30
		CiBHAD26
		CiBHAD27
		CiBHAD29
		CiBHAD28
		CiBHAD75
		CiBHAD62
		CiBHAD59
		CiBHAD58
		CiBHAD48
		CiBHAD57
		CiBHAD49
		CiBHAD78
		CiBHAD80
		CiBHAD79
		CiBHAD43
		CiBHAD42
		CiBHAD41
Clade Ⅲb	AT5G16410	CiBHAD6	HvBAHD72	11
	AT1G78990	CiBHAD5	HvBAHD99
	AT1G32910	CiBHAD77	HvBAHD100
	AT1G31490		HvBAHD32
Clade Ⅳ			HvBAHD7	21
			HvBAHD8
			HvBAHD40
			HvBAHD41
			HvBAHD91
			HvBAHD62
			HvBAHD63
			HvBAHD64
			HvBAHD65
			HvBAHD101
			HvBAHD73
			HvBAHD76
			HvBAHD77
			HvBAHD80
			HvBAHD81
			HvBAHD20
			HvBAHD34
			HvBAHD36
			HvBAHD93
			HvBAHD57
			HvBAHD39
Clade Ⅴa	AT1G03390	CiBHAD22	HvBAHD43	79
	AT1G27620	CiBHAD50	HvBAHD115
	AT2G40230	CiBHAD10	HvBAHD35
	AT1G28680	CiBHAD18	HvBAHD97
	AT2G23510	CiBHAD60	HvBAHD3
	AT2G25150	CiBHAD82	HvBAHD16
	AT5G07080	CiBHAD36	HvBAHD10
	AT3G03480	CiBHAD37	HvBAHD11
	AT5G17540	CiBHAD39	HvBAHD82
	AT3G62160	CiBHAD40	HvBAHD4
	AT3G48720	CiBHAD38	HvBAHD42
	AT5G63560	CiBHAD34	HvBAHD5
	AT5G41040	CiBHAD81	HvBAHD66
	AT4G31910	CiBHAD20	HvBAHD112
		CiBHAD47	HvBAHD78
		CiBHAD19	HvBAHD79
		CiBHAD73	HvBAHD67
		CiBHAD74	HvBAHD14
		CiBHAD72	HvBAHD37
		CiBHAD71	HvBAHD2
		CiBHAD4	HvBAHD51
		CiBHAD46	HvBAHD45
		CiBHAD53	HvBAHD48
			HvBAHD46
			HvBAHD9
			HvBAHD109
			HvBAHD110
			HvBAHD111
			HvBAHD44
			HvBAHD50
			HvBAHD55
			HvBAHD53
			HvBAHD69
			HvBAHD107
			HvBAHD19
			HvBAHD86
			HvBAHD70
			HvBAHD18
			HvBAHD26
			HvBAHD71
			HvBAHD29
			HvBAHD49
Clade Ⅴb	AT2G19070	CiBHAD55	HvBAHD30	29
	AT5G48930	CiBHAD63	HvBAHD89
	AT5G57840	CiBHAD68	HvBAHD17
		CiBHAD69	HvBAHD54
		CiBHAD65	HvBAHD84
		CiBHAD66	HvBAHD92
		CiBHAD67	HvBAHD87
		CiBHAD64	HvBAHD90
		CiBHAD16	HvBAHD116
		CiBHAD8	HvBAHD74
		CiBHAD7	HvBAHD113
			HvBAHD102
			HvBAHD104
			HvBAHD105
			HvBAHD75
Total	55	88	116	259
