# Supplementary material for: Comprehensive Genomic Analysis of BAHD Gene Family: Expression Patterns During Development and Stress Responses in Pecan (Carya illinoinensis)
Source: Research Square preprint supplement (doi:10.21203/rs.3.rs-7300832/v1), 2025-10-01
Supplement: Supplementary file 2 [file 7c82986b5d343049c6a04e01.xlsx]

## Sheet: Sheet1
Table 1 The primer sequences used in qRT-PCR
No.	Primer name	Forward Primer (5'to3')	Reverse Primer (5'to3')
1	CiBAHD5	GGCAACAGTTCCCAGTGTCTAAGG	CGGCATCGGCATCACGTATCC
2	CiBAHD7	CCACGAGCGGTGCTTCCAAC	CCTACCATTGCCATCCCGTTTGAG
3	CiBAHD10	GCTCTTCCTTCGCTTCACCATCG	CGCATCCTTGAGACGAGCAGTG
4	CiBAHD11	GAAAGCGGCGAGTCACAAGGAG	TGCGGGAAAGGGAGGTTCTGAG
5	CiBAHD13	AGTCAAAGCGGCGAGTCACAAG	TGCGGGAAAGGGAGGTTCTGAG
6	CiBAHD15	AAAGCCGTGGACGAAAGAAGACAG	GCTCCTTCATCTCCAACGCCTTG
7	CiBAHD19	TGGAGGATTTGTTCTTGGGCTGTG	TACTCTATCTCAGGCGGGTTGCG
8	CiBAHD25	AAGAAGCCTCCGTTGCGTTTGG	GCTTTGCTTTGCCTCCTGGTTTG
9	CiBAHD26	AGGCTCTGTCGGCTTTCATTTGG	AGTGACGGAACTGTTATGGCAAGG
10	CiBAHD32	CCACTCCACCTTCGCCATTACAC	AGTGCCAAAGCCTCGGACAAAG
11	CiBAHD50	CCAATCACACCACTCCACACTCG	GAGGCGGTGAAGGTTAAGGATGC
12	CiBAHD51	CGCTGGGAGATCACTGGCTAATTG	AGAGATTTCGGTTGCTTGGTCCAC
13	CiBAHD54	AGGCTTGGGCTGACACAACTTTG	TGGTCAATCAAGGCAGTGTAAGGC
14	CiBAHD55	CGAGCAGGATAAGAGCAGCGATTG	CGGCAGCGTCATCCAGTTCAC
15	CiBAHD57	AGTTGAGGTAGTCTCCGCACTCC	GAGAATGGTGGAACTGCCCTTCG
16	CiBAHD62	ATCGCCATTACGCTTTCCTCCAC	TTGCCCTCGTTGAACCAAAGACC
17	CiBAHD64	GCGGTGGTCTCTGTGTTGGAAC	GGCATAAGTGGCTCAGGTGATCG
18	CiBAHD77	TGTGTCGGCGGCAATAAGAGAAC	TAGCACGTCCATCAACCAACCAAC
19	CiBAHD82	ATGGGCTTGTCTCACTCCGTTTG	GTTCCCACCAGTCTCTCCCTCTC
20	CiBAHD83	TGGTCTCAGGACTACTTCGGGAAC	AGCAGCTTGTCGGTGTGGTTATTC
21	PR26S	CCCGAAGATGATTTGAAG	CCTTAATGCCACATAGAT
