# Supplementary material for: Comprehensive Genomic Analysis of BAHD Gene Family: Expression Patterns During Development and Stress Responses in Pecan (Carya illinoinensis)
Source: Research Square preprint supplement (doi:10.21203/rs.3.rs-7300832/v1), 2025-10-01
Supplement: Supplementary file 3 [file 7dcb16d48347d6ef3a2f0063.xlsx]

## Sheet: Sheet1
Information of 88 BAHD genes identified in Carya illinoinensis.
NO.	Chromosome	Gene ID	Name	Start	End	Gene length (bp)	protein length (aa)	MW (Da)	pI	exon number
1	Chr01	CiPaw.01G015600.1	CiBAHD1	2226789	2228270	1481	448	50833.2	6.43	1
2	Chr01	CiPaw.01G015900.1	CiBAHD2	2237212	2238558	1346	448	50744	6.35	1
3	Chr01	CiPaw.01G117400.1	CiBAHD3	34154517	34157224	2707	451	49848	5.39	2
4	Chr01	CiPaw.01G149900.1	CiBAHD4	40411465	40413514	2049	450	50248.9	7.59	2
5	Chr01	CiPaw.01G209000.1	CiBAHD5	48172277	48175899	3622	471	52006.8	5.98	2
6	Chr01	CiPaw.01G209100.1	CiBAHD6	48188204	48190324	2120	470	52025.8	5.98	2
7	Chr01	CiPaw.01G255800.1	CiBAHD7	53132006	53136462	4456	435	48261.2	5.95	2
8	Chr01	CiPaw.01G255900.1	CiBAHD8	53144151	53147114	2963	434	48200.1	6.13	2
9	Chr01	CiPaw.01G296000.1	CiBAHD9	56819505	56820971	1466	488	54172.6	8.68	1
10	Chr01	CiPaw.01G300600.1	CiBAHD10	57278660	57280259	1599	441	48611.2	8.48	1
11	Chr02	CiPaw.02G007400.1	CiBAHD11	1519027	1520971	1944	447	49359.1	6.36	1
12	Chr02	CiPaw.02G007500.1	CiBAHD12	1530902	1532287	1385	461	50679.6	6.28	1
13	Chr02	CiPaw.02G007600.1	CiBAHD13	1543442	1544780	1338	408	45050.2	6.19	2
14	Chr02	CiPaw.02G048300.1	CiBAHD14	11517005	11518381	1376	458	50638.4	6.18	1
15	Chr02	CiPaw.02G064800.1	CiBAHD15	19670610	19673956	3346	446	49247.4	6.21	2
16	Chr02	CiPaw.02G163000.1	CiBAHD16	33951221	33955787	4566	436	48464.4	5.83	2
17	Chr02	CiPaw.02G190200.1	CiBAHD17	36483506	36484972	1466	488	54259	8.75	1
18	Chr02	CiPaw.02G194100.1	CiBAHD18	36819613	36821656	2043	440	48276.7	8.51	1
19	Chr03	CiPaw.03G058600.1	CiBAHD19	5353776	5357874	4098	432	48209.9	5.93	2
20	Chr03	CiPaw.03G069300.1	CiBAHD20	6358585	6360177	1592	376	42125.2	9.32	7
21	Chr03	CiPaw.03G168200.1	CiBAHD21	24342297	24343688	1391	463	51741.7	6.13	1
22	Chr03	CiPaw.03G235700.1	CiBAHD22	49083266	49084654	1388	462	51880.2	6.47	1
23	Chr04	CiPaw.04G055000.1	CiBAHD23	5340142	5341518	1376	458	50658.5	6.29	1
24	Chr04	CiPaw.04G055100.1	CiBAHD24	5349392	5350768	1376	442	48916.6	5.7	2
25	Chr04	CiPaw.04G076500.1	CiBAHD25	8320476	8322246	1770	468	53269.9	7.59	1
26	Chr05	CiPaw.05G173700.1	CiBAHD26	30085341	30086639	1298	432	47960.8	5.34	1
27	Chr05	CiPaw.05G173800.1	CiBAHD27	30194946	30196238	1292	430	48183.7	7.13	1
28	Chr05	CiPaw.05G173900.1	CiBAHD28	30228308	30229642	1334	444	49587.9	5.98	1
29	Chr05	CiPaw.05G174000.1	CiBAHD29	30285884	30287215	1331	443	49794.1	6.81	1
30	Chr05	CiPaw.05G174100.1	CiBAHD30	30359689	30360984	1295	431	48072.4	5.48	1
31	Chr05	CiPaw.05G174200.1	CiBAHD31	30414070	30415365	1295	431	47986.7	5.97	1
32	Chr05	CiPaw.05G174300.1	CiBAHD32	30498825	30500290	1465	352	39638.4	6.1	4
33	Chr05	CiPaw.05G174400.1	CiBAHD33	30554519	30555817	1298	432	48554.2	5.91	1
34	Chr05	CiPaw.05G210500.1	CiBAHD34	39834182	39835956	1774	455	50291.1	6.29	2
35	Chr05	CiPaw.05G263600.1	CiBAHD35	49429273	49432297	3024	452	50680.7	5.42	2
36	Chr06	CiPaw.06G037100.1	CiBAHD36	7132681	7134258	1577	461	50996	7.06	2
37	Chr06	CiPaw.06G037200.1	CiBAHD37	7205174	7206690	1516	475	52551.1	8.26	2
38	Chr06	CiPaw.06G037400.1	CiBAHD38	7244447	7246015	1568	455	50570.4	7.06	2
39	Chr06	CiPaw.06G037500.1	CiBAHD39	7349453	7350888	1435	403	44356.5	8.54	2
40	Chr06	CiPaw.06G037600.1	CiBAHD40	7365168	7366681	1513	460	50852.8	7.93	2
41	Chr06	CiPaw.06G063400.1	CiBAHD41	21476514	21477841	1327	418	47076	5.61	3
42	Chr06	CiPaw.06G063500.1	CiBAHD42	21618789	21620123	1334	444	50012.5	6.17	1
43	Chr06	CiPaw.06G063600.1	CiBAHD43	21934093	21939917	5824	435	48734.3	7.97	2
44	Chr06	CiPaw.06G063700.1	CiBAHD44	22042042	22043340	1298	432	48384.9	5.33	1
45	Chr07	CiPaw.07G065600.1	CiBAHD45	11159865	11162068	2203	461	51277.3	5.86	2
46	Chr07	CiPaw.07G085300.1	CiBAHD46	20365572	20370179	4607	456	50305.5	5.98	2
47	Chr07	CiPaw.07G124900.1	CiBAHD47	32091781	32094685	2904	444	48565.7	5.48	2
48	Chr07	CiPaw.07G138800.1	CiBAHD48	33901972	33903333	1361	438	48305.5	5.7	2
49	Chr07	CiPaw.07G139100.1	CiBAHD49	33936124	33937686	1562	520	57816.8	7.48	1
50	Chr07	CiPaw.07G157600.1	CiBAHD50	35851776	35854811	3035	457	51413.3	6.57	2
51	Chr07	CiPaw.07G164900.1	CiBAHD51	36856378	36858597	2219	400	44624.1	4.99	2
52	Chr07	CiPaw.07G209600.1	CiBAHD52	41578223	41579521	1298	432	47923.8	6.6	1
53	Chr07	CiPaw.07G228500.1	CiBAHD53	43277603	43280222	2619	438	48437.6	9.15	4
54	Chr08	CiPaw.08G014300.1	CiBAHD54	1420240	1422538	2298	451	51027.1	6.35	2
55	Chr08	CiPaw.08G034300.1	CiBAHD55	3497110	3499118	2008	456	50682.2	7.19	1
56	Chr08	CiPaw.08G056000.1	CiBAHD56	6161661	6164801	3140	451	49451.4	5.14	2
57	Chr08	CiPaw.08G072800.1	CiBAHD57	8323567	8324971	1404	430	47785.9	6.13	3
58	Chr09	CiPaw.09G026500.1	CiBAHD58	2719154	2720524	1370	456	51230.6	6.24	1
59	Chr09	CiPaw.09G026600.1	CiBAHD59	2763862	2764971	1109	369	40968.9	7.64	1
60	Chr09	CiPaw.09G067300.1	CiBAHD60	7021263	7023007	1744	455	50141	5.97	2
61	Chr09	CiPaw.09G207000.1	CiBAHD61	41243798	41245777	1979	487	53885.7	8.55	1
62	Chr10	CiPaw.10G024200.1	CiBAHD62	2426064	2427425	1361	453	50917.3	7.11	1
63	Chr10	CiPaw.10G139400.1	CiBAHD63	32728106	32729989	1883	458	51364.1	7.12	1
64	Chr10	CiPaw.10G139600.1	CiBAHD64	32860426	32861847	1421	351	39628.5	8.52	1
65	Chr10	CiPaw.10G139900.1	CiBAHD65	33027188	33033739	6551	442	49300.6	6.04	2
66	Chr10	CiPaw.10G140000.1	CiBAHD66	33181621	33189171	7550	455	50841.1	6.29	2
67	Chr10	CiPaw.10G140100.1	CiBAHD67	33243888	33245261	1373	457	51150.5	5.93	1
68	Chr10	CiPaw.10G140300.1	CiBAHD68	33417519	33418890	1371	430	48127.2	6.61	2
69	Chr10	CiPaw.10G140400.1	CiBAHD69	33517193	33518585	1392	426	48123.4	7.19	1
70	Chr10	CiPaw.10G154600.1	CiBAHD70	36929703	36931190	1487	495	54759.5	8.71	1
71	Chr11	CiPaw.11G004200.1	CiBAHD71	800022	802446	2424	433	47646	6.13	2
72	Chr11	CiPaw.11G004300.1	CiBAHD72	815492	817338	1846	459	51000	5.56	2
73	Chr11	CiPaw.11G004400.1	CiBAHD73	823298	833513	10215	397	44192.8	6.1	4
74	Chr11	CiPaw.11G004500.1	CiBAHD74	838581	841620	3039	440	48958.4	5.53	2
75	Chr11	CiPaw.11G011400.1	CiBAHD75	1669474	1674440	4966	547	60394.6	6.48	4
76	Chr11	CiPaw.11G069200.1	CiBAHD76	16375814	16377135	1321	372	41427.4	5.34	2
77	Chr11	CiPaw.11G076500.1	CiBAHD77	22513872	22515530	1658	478	53142.1	8.21	1
78	Chr11	CiPaw.11G090200.1	CiBAHD78	29139800	29141130	1330	392	43686.4	5.34	3
79	Chr11	CiPaw.11G090300.1	CiBAHD79	29169375	29170718	1343	447	49937.8	5.44	1
80	Chr11	CiPaw.11G090500.1	CiBAHD80	29214351	29215679	1328	442	49278	5.67	1
81	Chr12	CiPaw.12G125800.1	CiBAHD81	29654253	29656056	1803	461	51444.2	6.57	2
82	Chr13	CiPaw.13G067200.1	CiBAHD82	6787548	6788999	1451	483	53338.2	6.18	1
83	Chr15	CiPaw.15G054200.1	CiBAHD83	9696858	9698216	1358	452	50926.7	5.97	1
84	Chr15	CiPaw.15G054300.1	CiBAHD84	9725002	9726258	1256	418	46894	6.24	1
85	Chr15	CiPaw.15G151900.1	CiBAHD85	39642098	39643431	1333	413	46183.7	5.61	3
86	Chr15	CiPaw.15G152200.1	CiBAHD86	39694199	39695536	1337	445	50009.2	6.86	1
87	Chr15	CiPaw.15G152300.1	CiBAHD87	39708575	39709909	1334	444	50179.5	6.64	1
88	Chr16	CiPaw.16G040200.1	CiBAHD88	6858308	6859681	1373	457	51511.3	6.49	1
