# Supplementary material for: Comprehensive Genomic Analysis of BAHD Gene Family: Expression Patterns During Development and Stress Responses in Pecan (Carya illinoinensis)
Source: Research Square preprint supplement (doi:10.21203/rs.3.rs-7300832/v1), 2025-10-01
Supplement: Supplementary file 4 [file bf6d07cd6b34b5d8d4fd34bd.xlsx]

## Sheet: Sheet1
Table 4. The cis-acting elements of BAHD in C.illinoinensis
	Hormone													Stress						Development
	ABRE	TCA-element	CGTCA-motif	TGACG-motif	P-box	TATC-box	AuxRE	AuxRR-core	GARE-motif	SARE	TGA-box	TGA-element		ARE	LTR	MBS	TC-rich repeats	GC-motif		RY-element	CAT-box	MBSI	GCN4_motif	O2-site	MSA-like	circadian	NON-box	AACA_motif	HD-Zip 1
CiBAHD1	2	1	0	0	0	0	0	0	0	0	0	0		0	0	0	0	0		0	0	0	0	0	0	0	0	0	0
CiBAHD2	3	1	2	2	0	0	0	0	0	0	0	0		0	0	1	1	0		0	0	0	0	0	0	0	0	0	0
CiBAHD3	4	0	1	1	0	0	0	0	0	0	0	1		0	0	0	1	0		1	0	0	0	0	0	0	0	0	0
CiBAHD4	1	2	1	1	0	0	0	0	0	0	0	1		1	1	0	0	0		0	0	0	0	0	0	0	0	0	0
CiBAHD5	1	0	1	1	0	1	0	0	0	0	0	0		1	1	3	3	0		0	0	0	0	0	0	0	0	0	0
CiBAHD6	2	1	3	3	0	1	0	0	0	0	0	1		0	0	3	0	0		0	0	0	0	0	0	0	0	0	0
CiBAHD7	3	0	1	1	1	1	0	1	0	0	0	0		2	2	2	0	1		1	1	0	0	0	0	0	0	0	0
CiBAHD8	2	0	0	0	2	0	0	0	1	0	0	0		2	0	0	0	0		0	1	0	0	0	0	0	0	0	0
CiBAHD9	5	0	0	0	0	0	0	0	0	0	0	0		2	0	1	0	0		0	2	0	0	0	0	0	0	0	0
CiBAHD10	3	0	3	3	0	0	0	0	0	0	0	2		2	1	2	0	0		0	0	0	0	0	0	0	0	0	0
CiBAHD11	2	1	0	0	0	1	0	0	0	0	0	0		4	1	0	0	0		0	0	1	0	0	0	0	0	0	0
CiBAHD12	1	2	1	1	0	0	0	1	1	0	0	0		3	0	0	1	0		0	1	0	1	0	0	0	0	0	0
CiBAHD13	0	1	1	1	1	0	0	0	0	0	0	0		2	2	1	0	0		0	0	0	0	1	0	0	0	0	0
CiBAHD14	3	0	3	3	0	0	0	0	0	0	0	0		1	0	0	0	0		0	0	0	0	1	1	0	0	0	0
CiBAHD15	1	1	1	1	0	0	0	0	0	0	0	1		3	1	0	0	2		0	0	0	0	1	0	0	0	0	0
CiBAHD16	5	0	2	2	0	1	0	0	0	0	0	0		2	0	0	0	0		0	1	0	0	2	0	0	0	0	0
CiBAHD17	1	0	0	0	0	0	0	0	0	0	0	0		0	0	0	0	0		0	0	0	0	0	0	0	0	0	0
CiBAHD18	6	1	2	2	0	0	0	0	0	0	0	1		1	0	1	0	0		0	0	0	0	0	0	0	0	0	0
CiBAHD19	4	0	1	1	0	0	0	0	0	0	0	1		2	1	0	1	0		1	0	0	1	0	0	0	0	0	0
CiBAHD20	1	1	1	1	0	0	0	0	0	0	0	1		0	0	1	0	0		0	0	0	0	0	1	0	0	0	0
CiBAHD21	1	0	1	1	0	0	0	0	1	0	0	0		0	0	1	0	1		0	0	0	0	0	0	0	0	0	0
CiBAHD22	0	0	0	0	1	0	0	0	1	0	0	0		2	0	1	1	0		0	1	0	0	0	0	0	0	0	0
CiBAHD23	6	1	2	2	1	1	0	0	0	0	0	0		0	0	0	0	1		0	0	0	0	1	0	0	0	0	0
CiBAHD24	1	0	1	1	0	0	0	0	0	0	0	0		1	0	1	0	0		0	0	0	0	1	0	0	0	0	0
CiBAHD25	3	0	0	0	0	0	0	0	0	0	0	0		0	1	5	0	0		1	1	1	0	0	0	0	0	0	0
CiBAHD26	1	1	0	0	1	1	0	0	0	0	0	0		3	0	2	0	0		0	0	0	1	0	0	2	0	0	0
CiBAHD27	1	0	0	0	1	0	0	0	0	0	0	1		1	0	1	1	1		0	0	0	0	0	0	0	0	0	0
CiBAHD28	0	0	1	1	0	0	0	0	0	0	0	0		1	1	1	0	0		0	0	0	0	1	0	0	1	0	0
CiBAHD29	1	0	1	1	1	0	0	0	0	0	0	0		2	1	0	0	0		1	0	0	0	2	0	0	0	1	0
CiBAHD30	0	0	1	1	0	0	0	0	0	0	0	0		1	0	1	0	0		0	2	0	0	0	1	0	0	0	0
CiBAHD31	0	0	1	1	0	0	0	0	0	0	0	0		2	1	0	0	0		0	0	0	0	0	0	0	0	0	0
CiBAHD32	1	1	1	1	0	1	0	0	0	0	0	0		3	1	0	0	0		0	1	0	0	2	0	0	0	0	0
CiBAHD33	1	0	0	0	0	0	0	0	0	0	0	0		0	0	1	0	0		0	0	0	0	0	0	0	0	0	0
CiBAHD34	5	0	0	0	0	0	0	0	0	0	0	0		1	0	1	1	0		0	0	0	0	0	0	0	0	0	0
CiBAHD35	3	0	0	0	0	0	0	0	0	0	0	0		1	0	1	1	0		0	0	0	0	0	0	0	0	0	0
CiBAHD36	3	1	2	2	1	0	0	0	0	0	0	1		1	0	1	1	0		0	0	0	0	2	0	0	0	0	0
CiBAHD37	1	0	1	1	0	0	0	0	0	0	0	0		0	0	0	1	0		0	0	0	0	0	0	1	0	0	0
CiBAHD38	2	0	0	0	0	0	0	0	0	0	0	0		0	0	0	2	0		0	0	0	0	0	0	0	0	0	0
CiBAHD39	0	0	0	0	0	0	0	0	0	0	0	0		1	0	0	0	0		0	0	0	0	0	0	0	0	0	0
CiBAHD40	1	1	3	3	0	0	0	0	0	0	0	1		1	0	0	0	0		0	0	0	0	0	0	0	0	0	0
CiBAHD41	0	1	2	2	0	0	0	0	0	0	0	0		0	0	2	0	0		0	0	0	0	0	2	0	0	0	0
CiBAHD42	2	0	0	0	1	0	0	0	0	0	0	0		1	0	0	1	0		1	0	0	0	1	0	0	0	0	0
CiBAHD43	0	0	2	2	0	0	0	0	1	0	0	0		1	0	0	0	0		0	0	0	0	0	0	0	0	0	0
CiBAHD44	0	0	0	0	0	0	0	0	0	0	0	0		0	0	1	0	0		2	0	0	0	1	0	0	0	0	0
CiBAHD45	2	0	1	1	0	1	0	0	0	0	0	0		1	0	0	0	0		0	0	0	1	1	0	0	0	0	0
CiBAHD46	2	0	0	0	0	0	0	0	0	0	0	0		0	1	0	1	1		1	0	0	0	0	0	0	0	0	0
CiBAHD47	0	0	1	1	1	0	0	1	0	0	0	0		0	1	1	0	1		0	0	0	0	0	0	1	0	0	0
CiBAHD48	3	1	3	3	1	0	0	0	0	0	0	0		1	0	2	0	1		0	1	0	0	0	0	0	0	0	0
CiBAHD49	2	1	0	0	0	0	0	0	0	0	0	1		2	1	1	0	0		0	0	0	0	1	0	0	0	0	0
CiBAHD50	10	1	1	1	0	0	0	0	0	0	0	0		4	2	0	0	0		0	0	0	0	0	0	1	0	0	0
CiBAHD51	2	1	1	1	0	1	0	1	0	0	0	0		0	1	1	2	0		0	0	0	1	0	0	0	0	0	0
CiBAHD52	5	0	2	2	0	1	0	0	0	0	0	1		1	0	1	0	0		1	0	0	1	1	0	0	0	0	0
CiBAHD53	1	1	1	1	0	0	0	0	1	0	0	0		0	0	1	0	0		0	1	0	0	0	0	0	0	0	0
CiBAHD54	2	1	1	1	0	0	0	0	0	0	0	0		3	0	1	0	0		1	0	0	0	1	0	1	0	0	0
CiBAHD55	1	0	1	1	0	0	0	0	0	0	0	1		1	0	2	0	0		0	1	0	0	1	0	0	0	0	0
CiBAHD56	4	1	0	0	0	1	0	0	0	0	0	0		1	0	0	0	1		2	0	0	0	0	0	0	0	0	0
CiBAHD57	1	0	1	1	0	1	0	0	0	0	0	0		1	1	0	2	0		0	0	0	0	0	0	0	0	0	0
CiBAHD58	4	2	4	4	0	0	0	0	0	0	0	0		1	0	0	1	0		0	0	0	0	0	0	0	0	0	0
CiBAHD59	2	0	3	3	0	0	0	0	0	0	0	0		1	1	0	0	0		0	0	0	0	0	0	0	0	0	0
CiBAHD60	3	0	1	1	1	0	0	0	0	0	0	1		1	0	2	0	0		0	0	0	0	0	1	0	0	0	0
CiBAHD61	0	0	2	2	0	0	0	0	0	0	0	1		1	0	0	0	0		0	0	0	1	1	0	0	0	0	0
CiBAHD62	5	0	0	0	0	1	0	0	0	0	0	0		2	0	1	0	0		0	0	0	0	0	0	0	0	0	0
CiBAHD63	2	1	1	1	0	0	0	0	0	0	0	2		0	1	1	0	0		0	0	0	0	0	0	0	0	0	1
CiBAHD64	4	2	1	1	0	0	0	0	0	0	1	0		2	0	0	1	0		0	0	0	0	0	0	0	0	0	0
CiBAHD65	1	0	1	1	0	0	0	1	0	0	0	1		2	0	0	0	0		0	0	0	0	0	2	0	0	0	0
CiBAHD66	1	0	1	1	1	0	0	0	0	0	0	0		1	1	0	0	0		0	0	0	0	0	0	0	0	0	0
CiBAHD67	2	1	1	1	0	0	0	0	1	0	0	0		1	0	0	0	0		0	0	0	0	0	0	0	0	0	0
CiBAHD68	3	0	0	0	0	0	0	0	1	0	0	0		1	0	1	0	0		0	1	0	0	0	0	0	0	0	0
CiBAHD69	0	0	1	1	0	0	0	0	0	1	0	1		1	0	0	0	0		0	0	0	0	0	0	1	0	0	0
CiBAHD70	9	0	0	0	0	0	0	0	0	0	0	1		0	1	0	0	0		1	0	0	0	1	0	0	0	0	0
CiBAHD71	1	0	1	1	0	0	0	0	0	0	0	0		0	1	1	0	0		0	0	0	0	0	0	0	0	0	0
CiBAHD72	0	1	0	0	0	0	0	0	0	0	0	0		0	1	0	0	0		0	0	0	0	0	0	0	0	0	0
CiBAHD73	1	2	1	1	0	0	0	0	0	0	0	0		0	0	0	1	0		0	0	0	0	0	0	0	0	0	0
CiBAHD74	4	0	1	1	0	0	0	0	0	0	0	0		0	0	0	1	0		0	0	0	0	0	0	0	0	0	0
CiBAHD75	1	0	0	0	0	0	0	0	0	0	0	0		1	0	0	0	0		0	1	0	0	2	0	1	0	0	0
CiBAHD76	2	2	0	0	0	0	0	0	0	0	0	0		1	1	0	1	0		0	0	0	0	1	0	0	0	0	0
CiBAHD77	1	1	0	0	0	0	0	0	0	0	0	0		4	0	0	1	1		0	0	0	0	0	0	0	0	0	1
CiBAHD78	4	0	2	2	0	0	0	0	0	0	0	2		0	0	0	0	0		2	0	0	0	1	0	0	0	1	0
CiBAHD79	3	0	0	0	1	0	0	0	1	0	0	0		2	1	0	0	0		0	0	0	0	1	0	0	0	1	0
CiBAHD80	2	0	1	1	0	0	1	0	0	0	0	1		0	1	0	0	0		0	0	0	0	2	0	0	0	1	0
CiBAHD81	4	0	0	0	0	0	0	0	0	0	0	0		0	2	0	0	0		0	0	1	0	0	0	0	0	0	0
CiBAHD82	2	0	1	1	0	0	0	0	0	0	0	0		0	1	1	3	0		0	2	0	0	0	0	0	0	0	0
CiBAHD83	1	1	1	1	1	0	0	0	0	0	0	0		3	1	1	0	0		0	0	0	0	1	2	0	0	0	0
CiBAHD84	2	1	2	2	1	0	0	0	0	0	0	0		2	0	1	0	0		0	0	0	0	0	0	2	0	0	0
CiBAHD85	2	1	0	0	0	0	0	1	0	0	0	0		1	0	1	0	0		0	1	0	2	0	0	0	0	0	0
CiBAHD86	3	2	0	0	0	0	0	0	0	0	0	0		0	0	1	1	0		0	0	0	0	0	0	0	0	0	0
CiBAHD87	1	2	0	0	0	1	0	0	1	0	0	1		1	0	2	0	0		0	0	0	0	0	0	0	0	0	0
CiBAHD88	0	0	2	2	0	0	0	0	0	0	0	0		2	0	0	1	0		0	0	0	0	0	0	0	0	0	0
