# Supplementary material for: Comprehensive Genomic Analysis of BAHD Gene Family: Expression Patterns During Development and Stress Responses in Pecan (Carya illinoinensis)
Source: Research Square preprint supplement (doi:10.21203/rs.3.rs-7300832/v1), 2025-10-01
Supplement: Supplementary file 5 [file dd3023e5cbb5b644015245b1.xlsx]

## Sheet: Sheet1
Table 6 Collinearity analysis between Carya illinoinensis and other plants.
C. illinoinensis to C. illinoinensis	Gene ID		Gene ID
	CiPaw.01G117400.1.v1.1	==	CiPaw.02G064800.1.v1.1
	CiPaw.01G255800.1.v1.1	==	CiPaw.02G163000.1.v1.1
	CiPaw.01G296000.1.v1.1	==	CiPaw.02G190200.1.v1.1
	CiPaw.01G300600.1.v1.1	==	CiPaw.02G194100.1.v1.1
	CiPaw.01G015600.1.v1.1	==	CiPaw.02G007400.1.v1.1
	CiPaw.01G296000.1.v1.1	==	CiPaw.09G207000.1.v1.1
	CiPaw.01G296000.1.v1.1	==	CiPaw.10G154600.1.v1.1
	CiPaw.01G015600.1.v1.1	==	CiPaw.15G054200.1.v1.1
	CiPaw.01G015600.1.v1.1	==	CiPaw.16G040200.1.v1.1
	CiPaw.02G190200.1.v1.1	==	CiPaw.09G207000.1.v1.1
	CiPaw.02G190200.1.v1.1	==	CiPaw.10G154600.1.v1.1
	CiPaw.02G007400.1.v1.1	==	CiPaw.15G054200.1.v1.1
	CiPaw.02G007400.1.v1.1	==	CiPaw.16G040200.1.v1.1
	CiPaw.03G058600.1.v1.1	==	CiPaw.11G004200.1.v1.1
	CiPaw.05G173800.1.v1.1	==	CiPaw.06G063400.1.v1.1
	CiPaw.05G174000.1.v1.1	==	CiPaw.06G063600.1.v1.1
	CiPaw.05G174300.1.v1.1	==	CiPaw.06G063700.1.v1.1
	CiPaw.05G173700.1.v1.1	==	CiPaw.11G011400.1.v1.1
	CiPaw.07G164900.1.v1.1	==	CiPaw.08G056000.1.v1.1
	CiPaw.09G026500.1.v1.1	==	CiPaw.10G024200.1.v1.1
	CiPaw.09G207000.1.v1.1	==	CiPaw.10G154600.1.v1.1
	CiPaw.15G054200.1.v1.1	==	CiPaw.16G040200.1.v1.1
A. thaliana to C. illinoinensis	Gene ID		Gene ID
	#N/A	==	CiPaw.01G255800.1.v1.1
	#N/A	==	CiPaw.02G163000.1.v1.1
	#N/A	==	CiPaw.01G255900.1.v1.1
	AT2G19070.1.TAIR10	==	CiPaw.08G034300.1.v1.1
	#N/A	==	CiPaw.10G139600.1.v1.1
	#N/A	==	CiPaw.10G140100.1.v1.1
	#N/A	==	CiPaw.10G140000.1.v1.1
	#N/A	==	CiPaw.10G139900.1.v1.1
	#N/A	==	CiPaw.10G140400.1.v1.1
	#N/A	==	CiPaw.10G139400.1.v1.1
	#N/A	==	CiPaw.10G140300.1.v1.1
	#N/A	==	CiPaw.01G149900.1.v1.1
	#N/A	==	CiPaw.07G085300.1.v1.1
	AT3G48720.1.TAIR10	==	CiPaw.11G004200.1.v1.1
	#N/A	==	CiPaw.11G004300.1.v1.1
	AT5G41040.1.TAIR10	==	CiPaw.03G058600.1.v1.1
	#N/A	==	CiPaw.11G004400.1.v1.1
	#N/A	==	CiPaw.11G004500.1.v1.1
	#N/A	==	CiPaw.03G235700.1.v1.1
	AT3G62160.1.TAIR10	==	CiPaw.07G124900.1.v1.1
	AT1G28680.1.TAIR10	==	CiPaw.09G067300.1.v1.1
	#N/A	==	CiPaw.13G067200.1.v1.1
	#N/A	==	CiPaw.07G157600.1.v1.1
	AT2G40230.1.TAIR10	==	CiPaw.02G194100.1.v1.1
	AT2G40230.1.TAIR10	==	CiPaw.01G300600.1.v1.1
	#N/A	==	CiPaw.03G069300.1.v1.1
	#N/A	==	CiPaw.12G125800.1.v1.1
	#N/A	==	CiPaw.05G210500.1.v1.1
	#N/A	==	CiPaw.06G037400.1.v1.1
	#N/A	==	CiPaw.06G037200.1.v1.1
	#N/A	==	CiPaw.06G037100.1.v1.1
	#N/A	==	CiPaw.06G037500.1.v1.1
	#N/A	==	CiPaw.06G037600.1.v1.1
	AT4G31910.1.TAIR10	==	CiPaw.07G228500.1.v1.1
	#N/A	==	CiPaw.05G174200.1.v1.1
	#N/A	==	CiPaw.05G174100.1.v1.1
	#N/A	==	CiPaw.05G174300.1.v1.1
	#N/A	==	CiPaw.05G174400.1.v1.1
	#N/A	==	CiPaw.06G063700.1.v1.1
	#N/A	==	CiPaw.05G173900.1.v1.1
	#N/A	==	CiPaw.05G174000.1.v1.1
	AT1G24430.1.TAIR10	==	CiPaw.05G173800.1.v1.1
	AT1G24420.1.TAIR10	==	CiPaw.05G173700.1.v1.1
	#N/A	==	CiPaw.15G152200.1.v1.1
	#N/A	==	CiPaw.15G152300.1.v1.1
	#N/A	==	CiPaw.15G151900.1.v1.1
	#N/A	==	CiPaw.04G076500.1.v1.1
	#N/A	==	CiPaw.09G026500.1.v1.1
	#N/A	==	CiPaw.09G026600.1.v1.1
	#N/A	==	CiPaw.10G024200.1.v1.1
	#N/A	==	CiPaw.07G139100.1.v1.1
	#N/A	==	CiPaw.08G072800.1.v1.1
	#N/A	==	CiPaw.07G138800.1.v1.1
	#N/A	==	CiPaw.11G090500.1.v1.1
	#N/A	==	CiPaw.11G090300.1.v1.1
	#N/A	==	CiPaw.11G090200.1.v1.1
	AT3G26040.1.TAIR10	==	CiPaw.06G063400.1.v1.1
	#N/A	==	CiPaw.06G063500.1.v1.1
	#N/A	==	CiPaw.06G063600.1.v1.1
	#N/A	==	CiPaw.07G209600.1.v1.1
	#N/A	==	CiPaw.11G011400.1.v1.1
	#N/A	==	CiPaw.15G054200.1.v1.1
	#N/A	==	CiPaw.15G054300.1.v1.1
	AT3G50290.1.TAIR10	==	CiPaw.16G040200.1.v1.1
	AT2G39980.1.TAIR10	==	CiPaw.09G207000.1.v1.1
	AT5G01210.1.TAIR10	==	CiPaw.10G154600.1.v1.1
	AT2G39980.1.TAIR10	==	CiPaw.01G296000.1.v1.1
	AT2G39980.1.TAIR10	==	CiPaw.02G190200.1.v1.1
	AT3G50270.1.TAIR10	==	CiPaw.01G015600.1.v1.1
	#N/A	==	CiPaw.01G015900.1.v1.1
	#N/A	==	CiPaw.02G007500.1.v1.1
	AT3G50270.1.TAIR10	==	CiPaw.02G007400.1.v1.1
	#N/A	==	CiPaw.02G007600.1.v1.1
	AT5G23940.1.TAIR10	==	CiPaw.05G263600.1.v1.1
	AT3G29590.1.TAIR10	==	CiPaw.04G055000.1.v1.1
	#N/A	==	CiPaw.02G048300.1.v1.1
	#N/A	==	CiPaw.04G055100.1.v1.1
	AT1G03495.1.TAIR10	==	CiPaw.03G168200.1.v1.1
	AT4G24510.1.TAIR10	==	CiPaw.07G164900.1.v1.1
	AT4G24510.1.TAIR10	==	CiPaw.08G056000.1.v1.1
	AT3G23840.1.TAIR10	==	CiPaw.01G117400.1.v1.1
	AT3G23840.1.TAIR10	==	CiPaw.02G064800.1.v1.1
	#N/A	==	CiPaw.11G069200.1.v1.1
	#N/A	==	CiPaw.07G065600.1.v1.1
	#N/A	==	CiPaw.08G014300.1.v1.1
	#N/A	==	CiPaw.01G209100.1.v1.1
	#N/A	==	CiPaw.01G209000.1.v1.1
	#N/A	==	CiPaw.11G076500.1.v1.1
H. vulgare to C. illinoinensis	Gene ID		Gene ID
	HORVU7Hr1G030670.1.r1	==	CiPaw.01G255800.1.v1.1
	HORVU2Hr1G086380.1.r1	==	CiPaw.02G163000.1.v1.1
	#N/A	==	CiPaw.01G255900.1.v1.1
	#N/A	==	CiPaw.08G034300.1.v1.1
	#N/A	==	CiPaw.10G139600.1.v1.1
	#N/A	==	CiPaw.10G140100.1.v1.1
	#N/A	==	CiPaw.10G140000.1.v1.1
	#N/A	==	CiPaw.10G139900.1.v1.1
	#N/A	==	CiPaw.10G140400.1.v1.1
	#N/A	==	CiPaw.10G139400.1.v1.1
	#N/A	==	CiPaw.10G140300.1.v1.1
	#N/A	==	CiPaw.01G149900.1.v1.1
	#N/A	==	CiPaw.07G085300.1.v1.1
	#N/A	==	CiPaw.11G004200.1.v1.1
	#N/A	==	CiPaw.11G004300.1.v1.1
	#N/A	==	CiPaw.03G058600.1.v1.1
	#N/A	==	CiPaw.11G004400.1.v1.1
	#N/A	==	CiPaw.11G004500.1.v1.1
	#N/A	==	CiPaw.03G235700.1.v1.1
	HORVU1Hr1G017410.1.r1	==	CiPaw.07G124900.1.v1.1
	#N/A	==	CiPaw.09G067300.1.v1.1
	#N/A	==	CiPaw.13G067200.1.v1.1
	#N/A	==	CiPaw.07G157600.1.v1.1
	#N/A	==	CiPaw.02G194100.1.v1.1
	#N/A	==	CiPaw.01G300600.1.v1.1
	#N/A	==	CiPaw.03G069300.1.v1.1
	#N/A	==	CiPaw.12G125800.1.v1.1
	#N/A	==	CiPaw.05G210500.1.v1.1
	#N/A	==	CiPaw.06G037400.1.v1.1
	#N/A	==	CiPaw.06G037200.1.v1.1
	#N/A	==	CiPaw.06G037100.1.v1.1
	#N/A	==	CiPaw.06G037500.1.v1.1
	#N/A	==	CiPaw.06G037600.1.v1.1
	#N/A	==	CiPaw.07G228500.1.v1.1
	#N/A	==	CiPaw.05G174200.1.v1.1
	#N/A	==	CiPaw.05G174100.1.v1.1
	#N/A	==	CiPaw.05G174300.1.v1.1
	#N/A	==	CiPaw.05G174400.1.v1.1
	#N/A	==	CiPaw.06G063700.1.v1.1
	#N/A	==	CiPaw.05G173900.1.v1.1
	#N/A	==	CiPaw.05G174000.1.v1.1
	#N/A	==	CiPaw.05G173800.1.v1.1
	#N/A	==	CiPaw.05G173700.1.v1.1
	#N/A	==	CiPaw.15G152200.1.v1.1
	#N/A	==	CiPaw.15G152300.1.v1.1
	#N/A	==	CiPaw.15G151900.1.v1.1
	#N/A	==	CiPaw.04G076500.1.v1.1
	#N/A	==	CiPaw.09G026500.1.v1.1
	#N/A	==	CiPaw.09G026600.1.v1.1
	#N/A	==	CiPaw.10G024200.1.v1.1
	#N/A	==	CiPaw.07G139100.1.v1.1
	#N/A	==	CiPaw.08G072800.1.v1.1
	#N/A	==	CiPaw.07G138800.1.v1.1
	#N/A	==	CiPaw.11G090500.1.v1.1
	#N/A	==	CiPaw.11G090300.1.v1.1
	#N/A	==	CiPaw.11G090200.1.v1.1
	#N/A	==	CiPaw.06G063400.1.v1.1
	#N/A	==	CiPaw.06G063500.1.v1.1
	#N/A	==	CiPaw.06G063600.1.v1.1
	#N/A	==	CiPaw.07G209600.1.v1.1
	#N/A	==	CiPaw.11G011400.1.v1.1
	#N/A	==	CiPaw.15G054200.1.v1.1
	#N/A	==	CiPaw.15G054300.1.v1.1
	#N/A	==	CiPaw.16G040200.1.v1.1
	HORVU1Hr1G073330.1.r1	==	CiPaw.09G207000.1.v1.1
	HORVU1Hr1G073330.1.r1	==	CiPaw.10G154600.1.v1.1
	HORVU1Hr1G073330.1.r1	==	CiPaw.01G296000.1.v1.1
	HORVU1Hr1G073330.1.r1	==	CiPaw.02G190200.1.v1.1
	#N/A	==	CiPaw.01G015600.1.v1.1
	#N/A	==	CiPaw.01G015900.1.v1.1
	#N/A	==	CiPaw.02G007500.1.v1.1
	#N/A	==	CiPaw.02G007400.1.v1.1
	#N/A	==	CiPaw.02G007600.1.v1.1
	#N/A	==	CiPaw.05G263600.1.v1.1
	#N/A	==	CiPaw.04G055000.1.v1.1
	#N/A	==	CiPaw.02G048300.1.v1.1
	#N/A	==	CiPaw.04G055100.1.v1.1
	#N/A	==	CiPaw.03G168200.1.v1.1
	#N/A	==	CiPaw.07G164900.1.v1.1
	#N/A	==	CiPaw.08G056000.1.v1.1
	#N/A	==	CiPaw.01G117400.1.v1.1
	#N/A	==	CiPaw.02G064800.1.v1.1
	#N/A	==	CiPaw.11G069200.1.v1.1
	#N/A	==	CiPaw.07G065600.1.v1.1
	#N/A		CiPaw.08G014300.1.v1.1
	#N/A		CiPaw.01G209100.1.v1.1
	#N/A		CiPaw.01G209000.1.v1.1
	#N/A		CiPaw.11G076500.1.v1.1
