# Supplementary material for: Comprehensive Genomic Analysis of BAHD Gene Family: Expression Patterns During Development and Stress Responses in Pecan (Carya illinoinensis)
Source: Research Square preprint supplement (doi:10.21203/rs.3.rs-7300832/v1), 2025-10-01
Supplement: Supplementary file 6 [file f92d75a8a2e81dca0ec0ce04.xlsx]

## Sheet: Sheet1
Table 5 Ka_Ks analysis of gene pairs in CiBAHD gene duplicated events.
Duplicated gene 1	Duplicated gene 2	Ka	Ks	Ka_Ks	EffectiveLength	Duplicate type
CiPaw.01G117400.1	CiPaw.02G064800.1	0.18841481025126844	0.6326569171167844	0.2978151430161132	1311	Segmental
CiPaw.01G255800.1	CiPaw.02G163000.1	0.12846637339809058	0.6507558492203113	0.19741101605465355	1302	Segmental
CiPaw.01G296000.1	CiPaw.02G190200.1	0.100356245380408	0.5037845139465973	0.1992047047937763	1464	Segmental
CiPaw.01G300600.1	CiPaw.02G194100.1	0.08864674652179708	0.4569572727796595	0.19399351274696028	1314	Segmental
CiPaw.01G015600.1	CiPaw.02G007400.1	0.3372272448159764	1.473347412095105	0.22888508307517105	1311	Segmental
CiPaw.01G296000.1	CiPaw.09G207000.1	0.2335815553627818	1.45943261179149	0.16004956547877508	1422	Segmental
CiPaw.01G296000.1	CiPaw.10G154600.1	0.2472270479067465	1.5592162815263424	0.15855853407631934	1431	Segmental
CiPaw.01G015600.1	CiPaw.15G054200.1	0.5369638257174835	2.1962456396608614	0.24449169802354168	1314	Segmental
CiPaw.01G015600.1	CiPaw.16G040200.1	0.5152739632018661	3.853317976151675	0.13372214968785742	1317	Segmental
CiPaw.02G190200.1	CiPaw.09G207000.1	0.24080244962153635	1.310809584912617	0.1837051333718994	1422	Segmental
CiPaw.02G190200.1	CiPaw.10G154600.1	0.2430909477524937	1.6341930318917441	0.1487528970008465	1431	Segmental
CiPaw.02G007400.1	CiPaw.15G054200.1	0.5145230236723102	NaN	NaN	1302	Segmental
CiPaw.02G007400.1	CiPaw.16G040200.1	0.4733957580525433	NaN	NaN	1311	Segmental
CiPaw.03G058600.1	CiPaw.11G004200.1	0.21406108047597716	0.9388158660048769	0.2280117840220493	1290	Segmental
CiPaw.05G173800.1	CiPaw.06G063400.1	0.5061447070376006	NaN	NaN	1182	Segmental
CiPaw.05G174000.1	CiPaw.06G063600.1	0.545891688166551	NaN	NaN	1251	Segmental
CiPaw.05G174300.1	CiPaw.06G063700.1	0.246662724409909	0.7911894990574881	0.3117618784169257	1044	Segmental
CiPaw.05G173700.1	CiPaw.11G011400.1	0.5809902997714621	1.650587474964905	0.351990008759648	1212	Segmental
CiPaw.07G164900.1	CiPaw.08G056000.1	0.16889131410727587	0.4368116686797472	0.386645610035432	1197	Segmental
CiPaw.09G026500.1	CiPaw.10G024200.1	0.27979135461612786	0.6731606939033306	0.41563828243410095	1341	Segmental
CiPaw.09G207000.1	CiPaw.10G154600.1	0.09232839505324414	0.649367515034772	0.14218203546615693	1458	Segmental
CiPaw.15G054200.1	CiPaw.16G040200.1	0.1492956849921061	0.6560387615434472	0.22757143898153456	1353	Segmental
